# Supplementary material for: Psychological Interventions for Vaccine Injections in Children and Adolescents: Systematic Review of Randomized and Quasi-Randomized Controlled Trials
Source: PubMed Central journal article supplement — Clin J Pain. 2015 Sep 17;31(Suppl 10):S72–89. doi: 10.1097/AJP.0000000000000265 (PMC4900411; doi:10.1097/ajp.0000000000000265), 2015-09-17

## Revman Plots: Video distraction child >3-12 yrs

### Pain

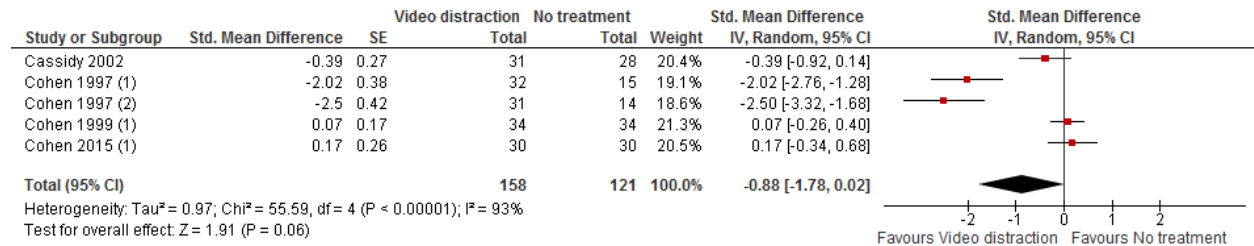

### Fear

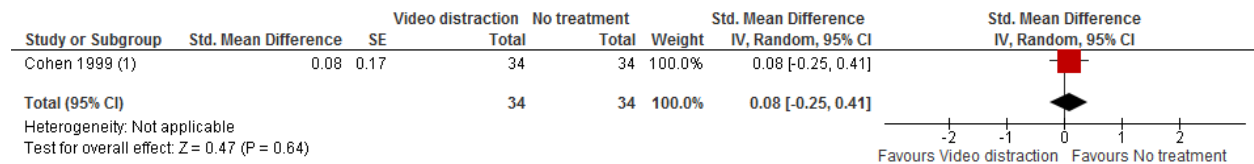

### Distress Pre-procedure + Acute + Recovery

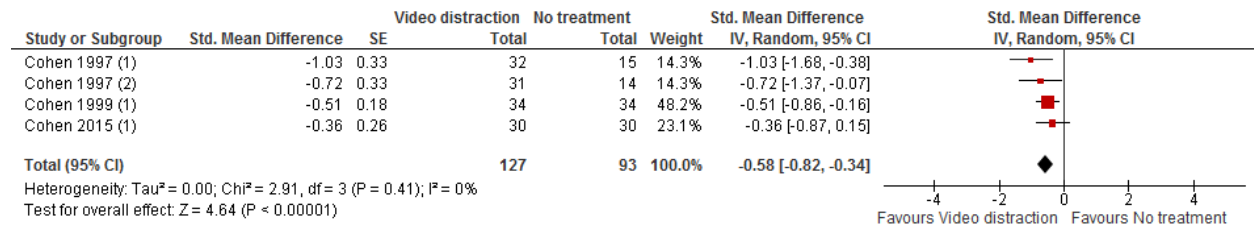

### Distress Acute

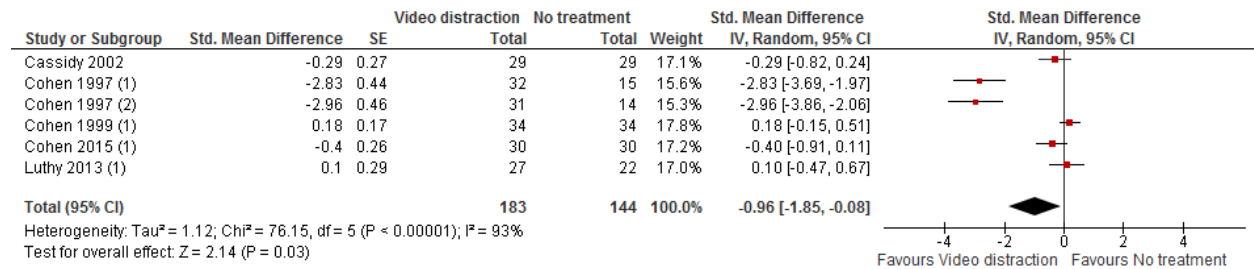

### Distress Pre-procedure

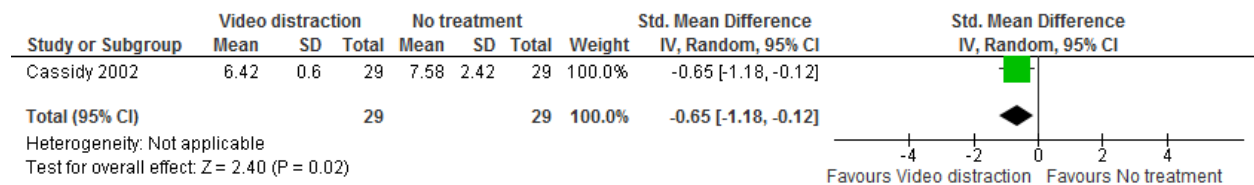

## Parent Fear

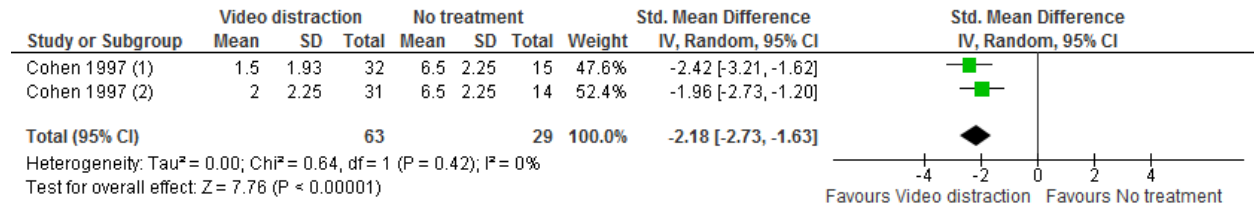

## Immunizer Fear

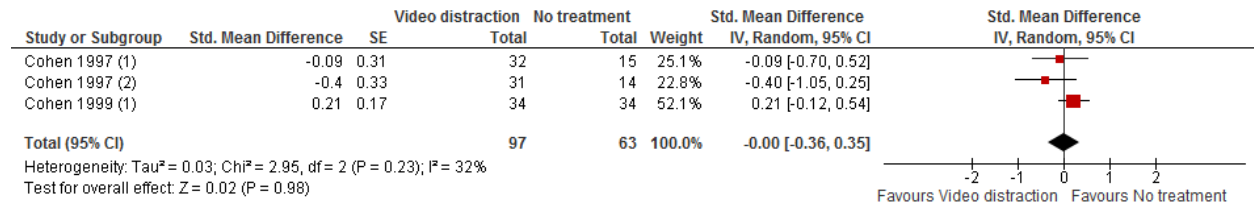

## Child Use of intervention Pre-procedure + Acute + Recovery

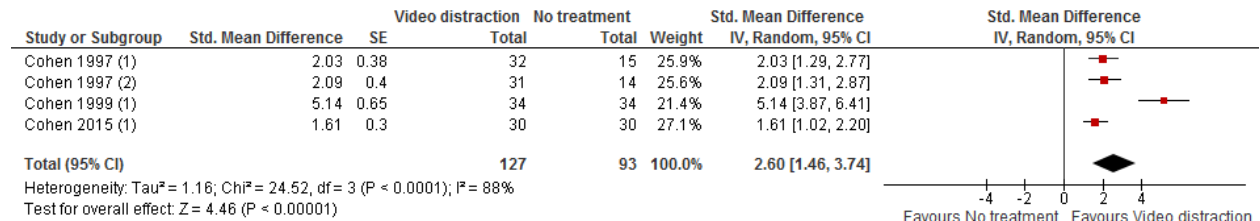

## Child Use of intervention Pre-procedure (post-intervention)

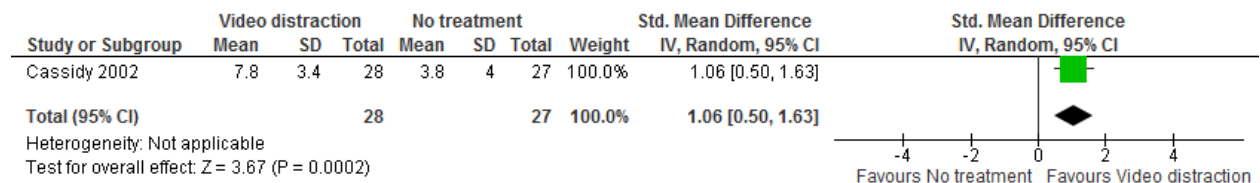

## Child Use of intervention Acute

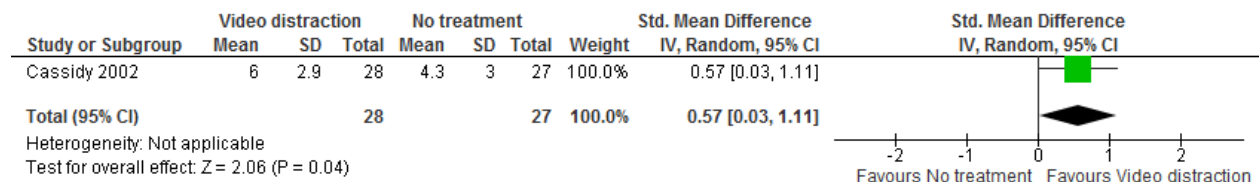

## Immunizer Use of intervention Pre-procedure + Acute + Recovery

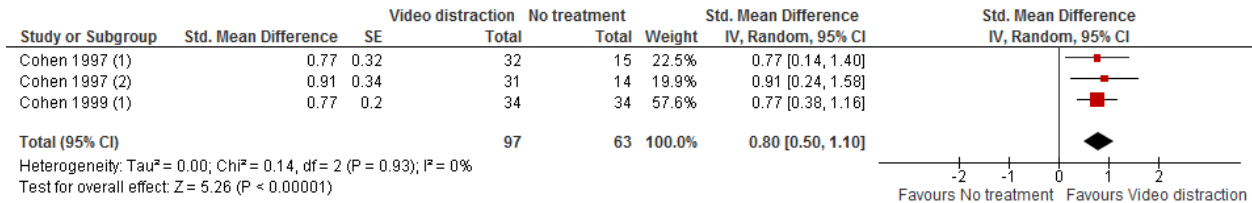

## Parent Use of intervention Pre-procedure + Acute + Recovery

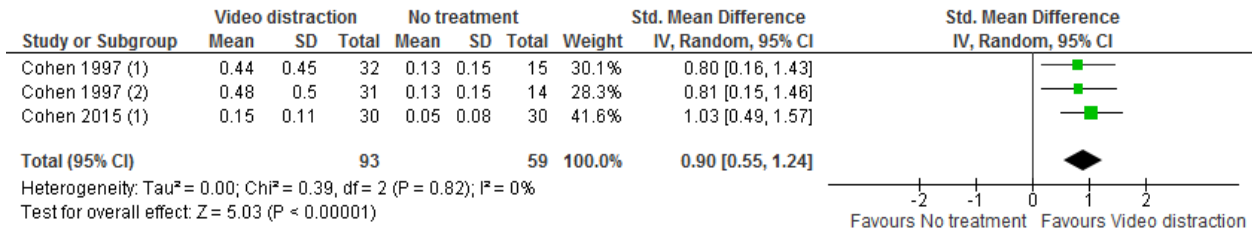

## Parent Preferences

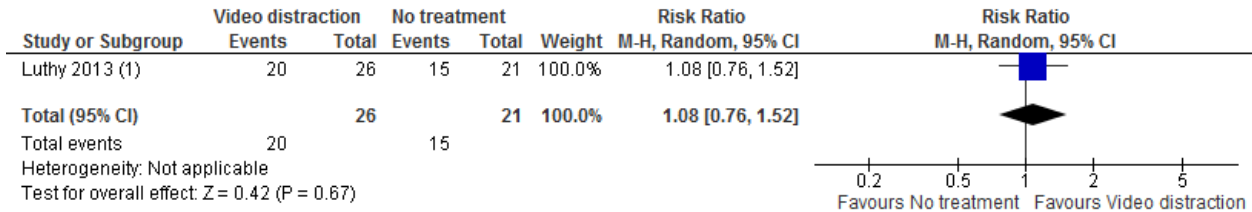

Supplement: ajp-31-s72-s004.pdf [file ajp-31-s72-s004.pdf]
