# Supplementary material for: Psychological Interventions for Vaccine Injections in Children and Adolescents: Systematic Review of Randomized and Quasi-Randomized Controlled Trials
Source: PubMed Central journal article supplement — Clin J Pain. 2015 Sep 17;31(Suppl 10):S72–89. doi: 10.1097/AJP.0000000000000265 (PMC4900411; doi:10.1097/ajp.0000000000000265), 2015-09-17

## Revman Plots: Music distraction child > 3-12 yrs

### Pain

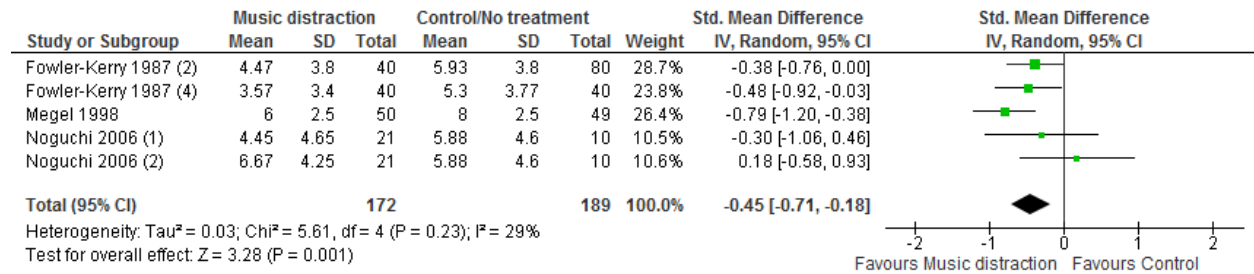

### Distress Pre-procedure (post-intervention)

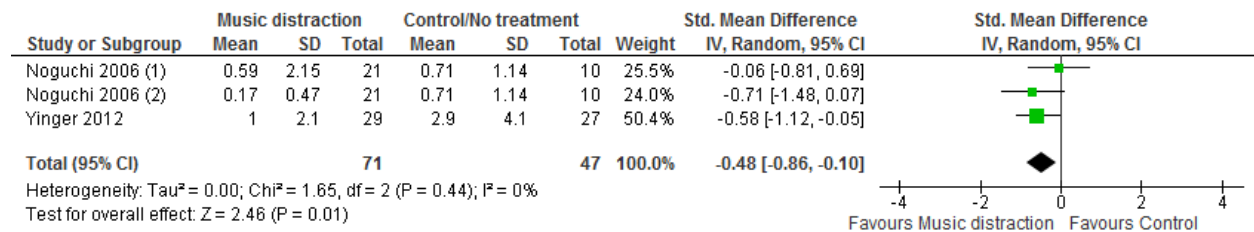

### Distress Acute

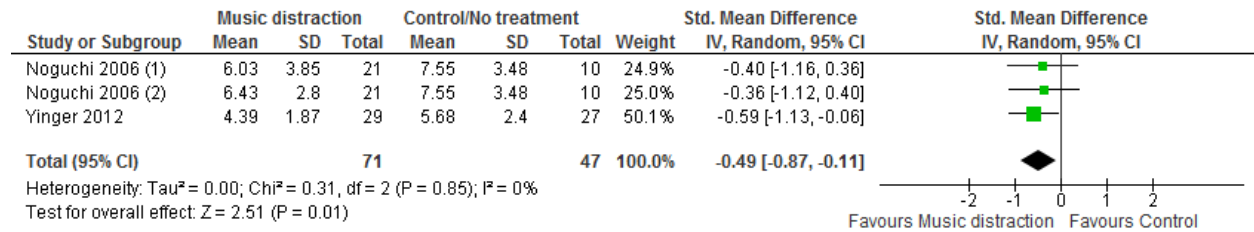

### Distress Recovery

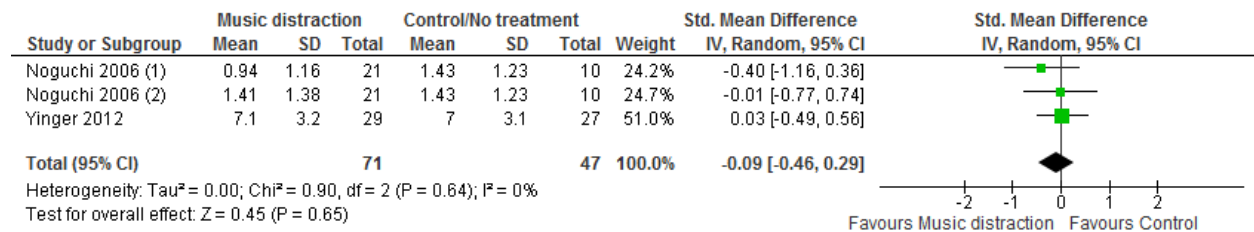

### Distress Acute + Recovery

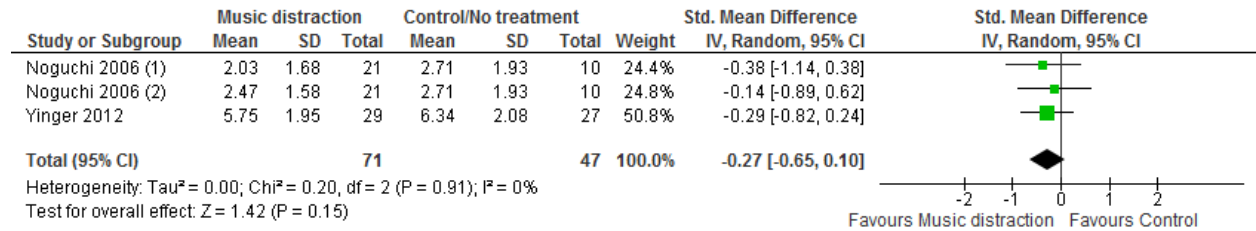

### Procedure Duration

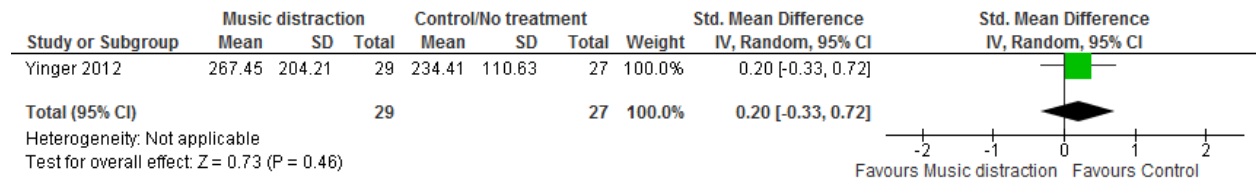

### Child Use of Intervention Pre-procedure

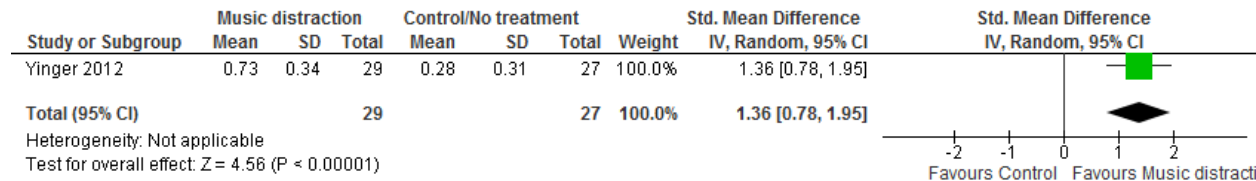

### Child Use of Intervention Acute + Recovery

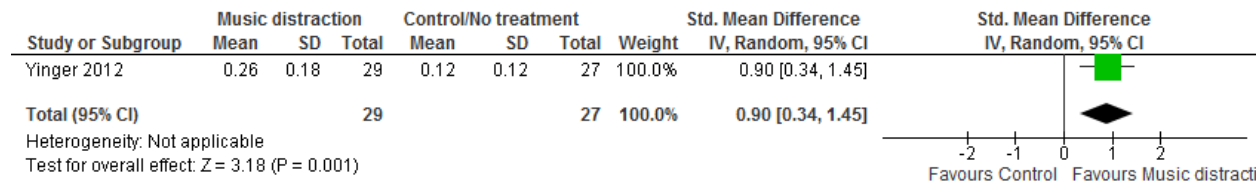

Supplement: ajp-31-s72-s005.pdf [file ajp-31-s72-s005.pdf]
