# Supplementary material for: Psychological Interventions for Vaccine Injections in Children and Adolescents: Systematic Review of Randomized and Quasi-Randomized Controlled Trials
Source: PubMed Central journal article supplement — Clin J Pain. 2015 Sep 17;31(Suppl 10):S72–89. doi: 10.1097/AJP.0000000000000265 (PMC4900411; doi:10.1097/ajp.0000000000000265), 2015-09-17

## Revman Plots: Breathing with toy distraction child >3-12 yrs

### Fear Pre-procedure

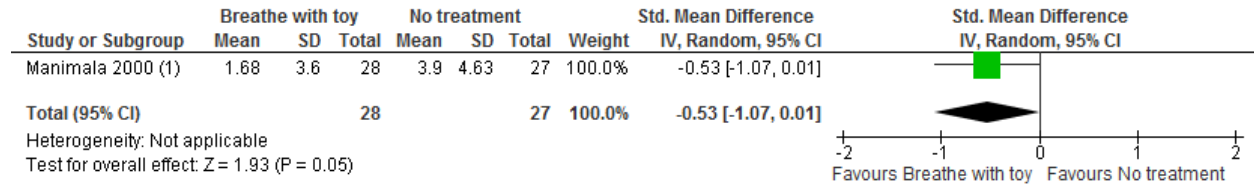

### Pain

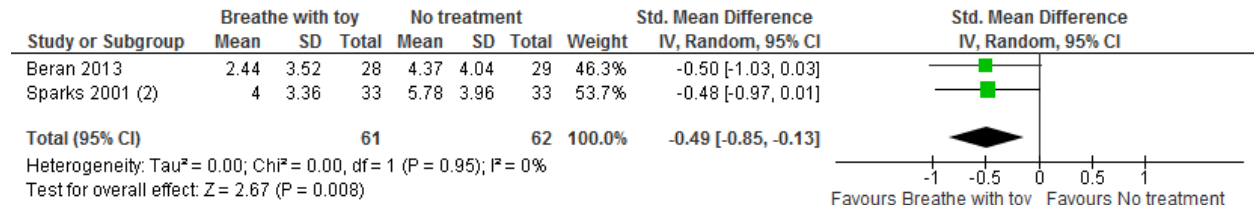

### Child Fear

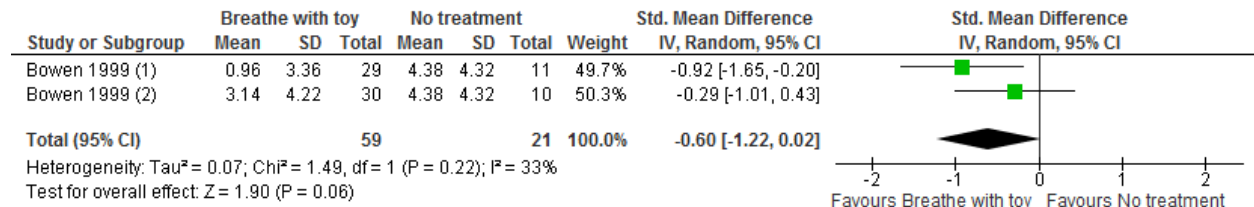

### Distress Acute

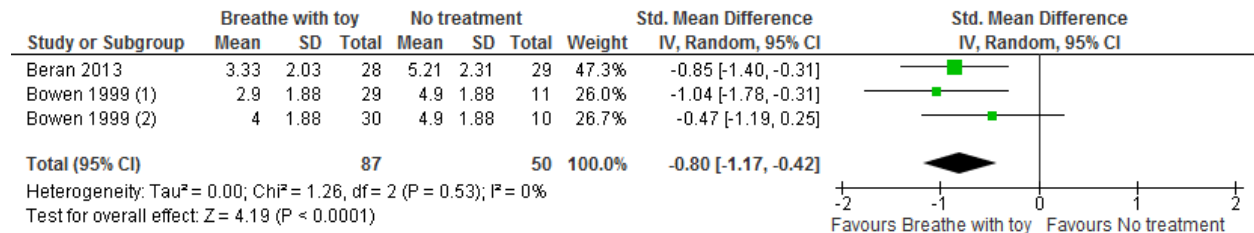

### Distress Pre-Procedure + Acute + Recovery

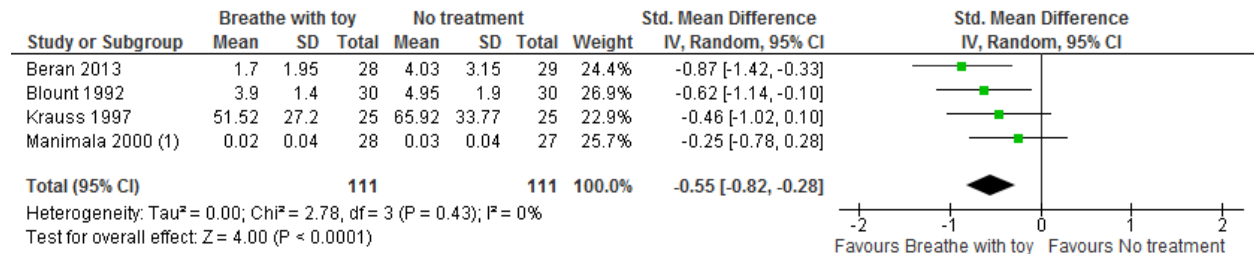

## Parent Fear Pre-procedure

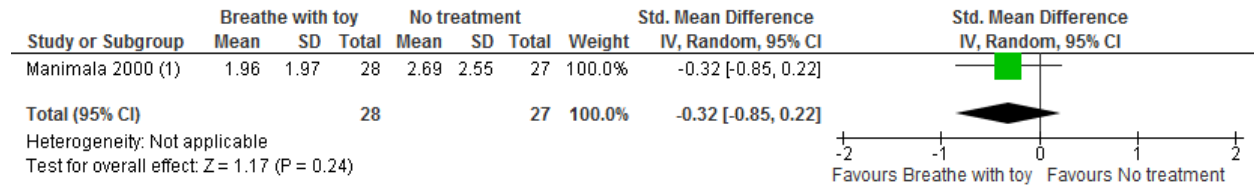

## Parent Fear

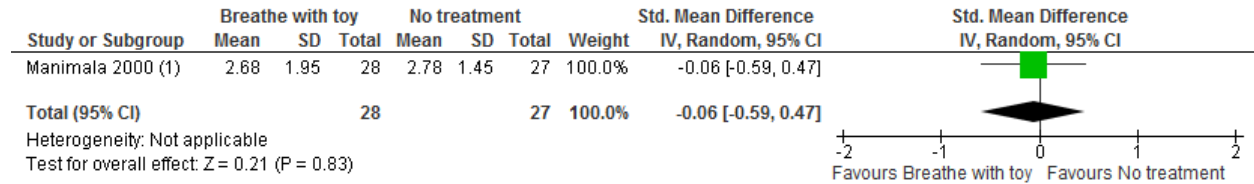

## Child Use of Intervention

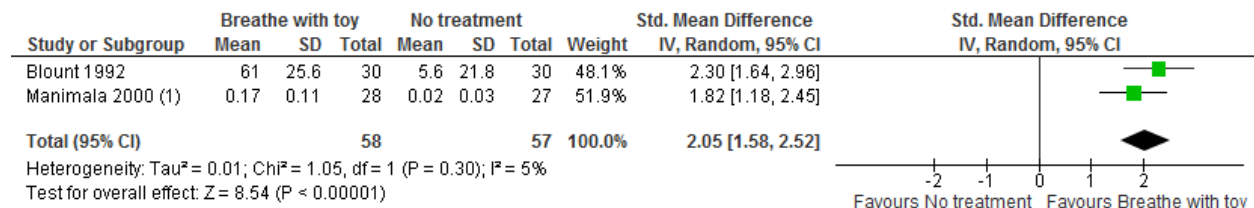

## Parent Use of Intervention

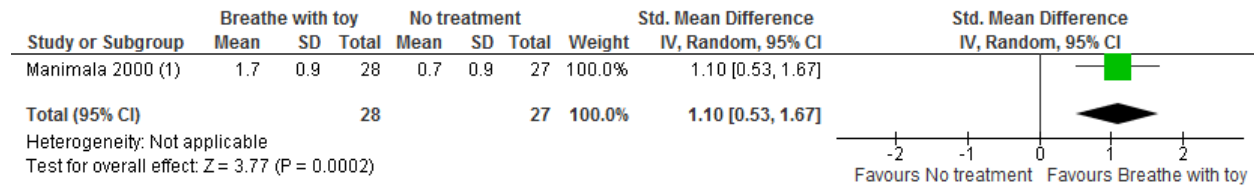

Supplement: ajp-31-s72-s007.pdf [file ajp-31-s72-s007.pdf]
