# Supplementary material for: Psychological Interventions for Vaccine Injections in Children and Adolescents: Systematic Review of Randomized and Quasi-Randomized Controlled Trials
Source: PubMed Central journal article supplement — Clin J Pain. 2015 Sep 17;31(Suppl 10):S72–89. doi: 10.1097/AJP.0000000000000265 (PMC4900411; doi:10.1097/ajp.0000000000000265), 2015-09-17
Supplement: ajp-31-s72-s010.pdf [file ajp-31-s72-s010.pdf]

Author(s): KAB/JP/AT

Date: 2015-04-29

Question: Should false suggestion vs no treatment/control be used for reducing vaccine injection pain in individuals of all ages?<sup>1,2</sup>

Settings: clinics

Bibliography: Eland 1981 (1,2), Fowler-Kerry 1987 (1,3)

| Quality assessment                                                                                                                                                 |                       |                      |                          |                         |                      |                      | No of patients   |                      | Effect            |                                                         | Quality     | Importance |
|--------------------------------------------------------------------------------------------------------------------------------------------------------------------|-----------------------|----------------------|--------------------------|-------------------------|----------------------|----------------------|------------------|----------------------|-------------------|---------------------------------------------------------|-------------|------------|
| No of studies                                                                                                                                                      | Design                | Risk of bias         | Inconsistency            | Indirectness            | Imprecision          | Other considerations | False suggestion | No treatment/control | Relative (95% CI) | Absolute                                                |             |            |
| <b>Pain (measured with: validated tool (Adapted Eland Color Assessment Tool 0-3, Visual Analog Scale 0-3); Better indicated by lower values)</b>                   |                       |                      |                          |                         |                      |                      |                  |                      |                   |                                                         |             |            |
| 2                                                                                                                                                                  | randomised trials     | serious <sup>3</sup> | no serious inconsistency | no serious indirectness | serious <sup>4</sup> | none                 | 100              | 140 <sup>5</sup>     | -                 | SMD 0.21 lower (0.47 lower to 0.05 higher) <sup>5</sup> | ⊕⊕○○<br>LOW | CRITICAL   |
| <b>Distress Pre-procedure (measured with: validated tool (3-point scale 1-3) by immunizer; Better indicated by lower values)</b>                                   |                       |                      |                          |                         |                      |                      |                  |                      |                   |                                                         |             |            |
| 1                                                                                                                                                                  | randomised trials     | serious <sup>6</sup> | no serious inconsistency | no serious indirectness | serious <sup>4</sup> | none                 | 20               | 20                   | -                 | SMD 0.28 lower (0.91 lower to 0.34 higher)              | ⊕⊕○○<br>LOW | IMPORTANT  |
| <b>Fear (assessed with: no data were identified for this critically important outcome)</b>                                                                         |                       |                      |                          |                         |                      |                      |                  |                      |                   |                                                         |             |            |
| 0                                                                                                                                                                  | No evidence available |                      |                          |                         |                      | none                 | -                | -                    | -                 | -                                                       |             | CRITICAL   |
| <b>Procedure Outcomes, Parent Fear, Vaccine Compliance, Memory, Preference, Satisfaction (assessed with: no data were identified for these important outcomes)</b> |                       |                      |                          |                         |                      |                      |                  |                      |                   |                                                         |             |            |
| 0                                                                                                                                                                  | No evidence available |                      |                          |                         |                      | none                 | -                | -                    | -                 | -                                                       |             | IMPORTANT  |

<sup>1</sup> In study by Eland (1981), analysis (1) compared suggestion and placebo vapocoolant to no treatment and placebo vapocoolant and analysis (2) compared suggestion and vapocoolant to no treatment and vapocoolant

<sup>2</sup> In study by Fowler-Kerry 1987, analysis (1) compared suggestion and no treatment, and analysis (3) compared suggestion and distraction and no treatment and distraction

<sup>3</sup> Immunizer and outcome assessor not consistently blinded; selective outcome reporting

<sup>4</sup> Confidence interval crosses line of nonsignificance and sample size was below the recommended optimum information size (OIS) of 400 for an effect size of 0.2

<sup>5</sup> Removal of the data from Eland 1981 (2) and Fowler-Kerry 1987 (3) does not alter the meta-analytic results: SMD = -0.24 (95% CI -0.59 to 0.11)

<sup>6</sup> Immunizer not blinded; outcome assessor not blinded; selective outcome reporting
