# Supplementary material for: Psychological Interventions for Vaccine Injections in Children and Adolescents: Systematic Review of Randomized and Quasi-Randomized Controlled Trials
Source: PubMed Central journal article supplement — Clin J Pain. 2015 Sep 17;31(Suppl 10):S72–89. doi: 10.1097/AJP.0000000000000265 (PMC4900411; doi:10.1097/ajp.0000000000000265), 2015-09-17
Supplement: ajp-31-s72-s011.pdf [file ajp-31-s72-s011.pdf]

Author(s): CMM/DL/AT

Date: 2015-03-21

Question: Should repeated reassurance vs control be used for reducing vaccine injection pain in individuals of all ages?

Settings: clinics (hospital and outpatient)

Bibliography: Gonzalez 1993 (2), Manimala 2000 (2)

| Quality assessment                                                                                                                                                                                                                                                            |                                  |                                 |                          |                         |                      |                      | No of patients       |         | Effect            |                                             | Quality       | Importance |
|-------------------------------------------------------------------------------------------------------------------------------------------------------------------------------------------------------------------------------------------------------------------------------|----------------------------------|---------------------------------|--------------------------|-------------------------|----------------------|----------------------|----------------------|---------|-------------------|---------------------------------------------|---------------|------------|
| No of studies                                                                                                                                                                                                                                                                 | Design                           | Risk of bias                    | Inconsistency            | Indirectness            | Imprecision          | Other considerations | Repeated reassurance | Control | Relative (95% CI) | Absolute                                    |               |            |
| <b>Pain (measured with: validated tool (Oucher scale 0-10); Better indicated by lower values)</b>                                                                                                                                                                             |                                  |                                 |                          |                         |                      |                      |                      |         |                   |                                             |               |            |
| 1                                                                                                                                                                                                                                                                             | randomised trials <sup>1</sup>   | serious <sup>2</sup>            | no serious inconsistency | no serious indirectness | serious <sup>3</sup> | none                 | 14                   | 14      | -                 | SMD 0.18 lower (0.92 lower to 0.56 higher)  | ⊕⊕⊕⊕ LOW      | CRITICAL   |
| <b>Fear Pre-procedure (measured with: validated tool (FACES scale 1-5) ; Better indicated by lower values)</b>                                                                                                                                                                |                                  |                                 |                          |                         |                      |                      |                      |         |                   |                                             |               |            |
| 1                                                                                                                                                                                                                                                                             | randomised trials <sup>4</sup>   | very serious <sup>5,6,7</sup>   | no serious inconsistency | no serious indirectness | serious <sup>3</sup> | none                 | 27                   | 27      | -                 | SMD 0.18 lower (0.71 lower to 0.36 higher)  | ⊕⊕⊕⊕ VERY LOW | CRITICAL   |
| <b>Distress Pre-Procedure + Acute + Recovery (measured with: validated tool (Observation Scale of Behavioral Distress-Revised: Child Restraint 0-1, Child Adult Medical Procedure Interaction Scale: Child Distress 0-1) by researcher; Better indicated by lower values)</b> |                                  |                                 |                          |                         |                      |                      |                      |         |                   |                                             |               |            |
| 2                                                                                                                                                                                                                                                                             | randomised trials <sup>1,4</sup> | very serious <sup>2,6,7,8</sup> | no serious inconsistency | no serious indirectness | serious <sup>3</sup> | none                 | 41                   | 41      | -                 | SMD 0.10 higher (0.33 lower to 0.54 higher) | ⊕⊕⊕⊕ VERY LOW | IMPORTANT  |
| <b>Parent Fear Pre-procedure (measured with: validated tool (Visual Analog Scale 0-10); Better indicated by lower values)</b>                                                                                                                                                 |                                  |                                 |                          |                         |                      |                      |                      |         |                   |                                             |               |            |
| 1                                                                                                                                                                                                                                                                             | randomised trials <sup>4</sup>   | very serious <sup>5,6,7</sup>   | no serious inconsistency | no serious indirectness | serious <sup>3</sup> | none                 | 27                   | 27      | -                 | SMD 0.52 lower (1.06 lower to 0.03 higher)  | ⊕⊕⊕⊕ VERY LOW | IMPORTANT  |
| <b>Parent Fear (measured with: validated tool (Likert Scale 1-5); Better indicated by lower values)</b>                                                                                                                                                                       |                                  |                                 |                          |                         |                      |                      |                      |         |                   |                                             |               |            |
| 1                                                                                                                                                                                                                                                                             | randomised                       | very                            | no serious               | no serious              | serious <sup>9</sup> | none                 | 27                   | 27      | -                 | SMD 0.98 higher (0.42 to 1.55)              | ⊕⊕⊕⊕ VERY     | IMPORTANT  |

|                                                                                                                                                                   |                                  |                               |                                        |                         |                      |      |    |    |   |                                             |                  |           |
|-------------------------------------------------------------------------------------------------------------------------------------------------------------------|----------------------------------|-------------------------------|----------------------------------------|-------------------------|----------------------|------|----|----|---|---------------------------------------------|------------------|-----------|
|                                                                                                                                                                   | trials <sup>4</sup>              | serious <sup>5,6,7</sup>      | inconsistency                          | indirectness            |                      |      |    |    |   | higher)                                     | LOW              |           |
| <b>Use of Intervention (measured with: validated tool (Child Adult Medical Procedure Interaction Scale 0-1) by researcher; Better indicated by higher values)</b> |                                  |                               |                                        |                         |                      |      |    |    |   |                                             |                  |           |
| 2                                                                                                                                                                 | randomised trials <sup>1,4</sup> | very serious <sup>2,6,7</sup> | no serious inconsistency <sup>10</sup> | no serious indirectness | serious <sup>3</sup> | none | 41 | 41 | - | SMD 1.62 higher (0.62 lower to 3.85 higher) | ⊕○○○<br>VERY LOW | IMPORTANT |
| <b>Procedure Outcomes, Vaccine Compliance, Memory, Preference, Satisfaction (assessed with: no data were identified for these important outcomes)</b>             |                                  |                               |                                        |                         |                      |      |    |    |   |                                             |                  |           |
| 0                                                                                                                                                                 | No evidence available            |                               |                                        |                         |                      | none | -  | -  | - | -                                           |                  | IMPORTANT |
|                                                                                                                                                                   |                                  |                               |                                        |                         |                      |      |    | 0% |   | -                                           |                  |           |

<sup>1</sup> In included study (Gonzalez 1993), mothers in the intervention (reassurance) group were given oral instructions, then listened to a demonstration audiotape, then practiced with help and received prompts during the procedure

<sup>2</sup> Parent not blinded; immunizer and researcher blinded to hypothesis; unclear whether child blinded; contamination of intervention (reassurance) in control (no treatment) group

<sup>3</sup> Confidence interval crosses line of nonsignificance and sample size was below the recommended optimum information size (OIS) of 400 for an effect size of 0.2

<sup>4</sup> In included study (Manimala 2000), parents in the intervention (reassurance) group received instruction, demonstration, and practiced with the child present; a poster was placed in the treatment room and parents were reminded during the procedure

<sup>5</sup> Parent and researcher not blinded; immunizer blinded to hypothesis; unclear if child blinded

<sup>6</sup> In study by Manimala (2000), randomization was by alternating order

<sup>7</sup> In study by Manimala (2000), children were exposed to modeling of a needle procedure and reassurance during parent training prior to the vaccination which may have obscured differences between groups

<sup>8</sup> In study by Gonzalez (1993), there was contamination of the intervention (reassurance) in the control (no treatment) group

<sup>9</sup> Sample size was below the recommended optimum information size (OIS) of 400 for an effect size of 0.2

<sup>10</sup> Heterogeneity may be explained by differences in methods of training
