# Supplementary material for: Psychological Interventions for Vaccine Injections in Children and Adolescents: Systematic Review of Randomized and Quasi-Randomized Controlled Trials
Source: PubMed Central journal article supplement — Clin J Pain. 2015 Sep 17;31(Suppl 10):S72–89. doi: 10.1097/AJP.0000000000000265 (PMC4900411; doi:10.1097/ajp.0000000000000265), 2015-09-17
Supplement: ajp-31-s72-s012.pdf [file ajp-31-s72-s012.pdf]

Author(s): KAB/KEB/CMM/AT/JP

Date: 2015-03-23

Question: Should verbal distraction vs control/no treatment be used for reducing vaccine injection pain in children >3 - 12 years?

Settings: clinic

Bibliography: Gonzalez 1993 (1), O'Laughlin 1995 (1)

| Quality assessment                                                                                                                                                                |                                |                          |                          |                         |                      |                      | No of patients     |                      | Effect               |                                               | Quality  | Importance |
|-----------------------------------------------------------------------------------------------------------------------------------------------------------------------------------|--------------------------------|--------------------------|--------------------------|-------------------------|----------------------|----------------------|--------------------|----------------------|----------------------|-----------------------------------------------|----------|------------|
| No of studies                                                                                                                                                                     | Design                         | Risk of bias             | Inconsistency            | Indirectness            | Imprecision          | Other considerations | Verbal distraction | Control/no treatment | Relative (95% CI)    | Absolute                                      |          |            |
| <b>Pain (measured with: validated tool (Oucher 0-10) ; Better indicated by lower values)</b>                                                                                      |                                |                          |                          |                         |                      |                      |                    |                      |                      |                                               |          |            |
| 1                                                                                                                                                                                 | randomised trials <sup>1</sup> | serious <sup>2</sup>     | no serious inconsistency | no serious indirectness | serious <sup>3</sup> | none                 | 14                 | 14                   | -                    | SMD 0.27 lower (1.02 lower to 0.47 higher)    | ⊕⊕○○ LOW | CRITICAL   |
| <b>Distress Pre-procedure + Acute + Recovery (measured with: validated tool (Observational Scale of Behavioral Distress 0-4) by researcher; Better indicated by lower values)</b> |                                |                          |                          |                         |                      |                      |                    |                      |                      |                                               |          |            |
| 2                                                                                                                                                                                 | randomised trials <sup>4</sup> | serious <sup>5,6,7</sup> | no serious inconsistency | no serious indirectness | serious <sup>8</sup> | none                 | 21                 | 25                   | -                    | SMD 1.22 lower (1.87 to 0.58 lower)           | ⊕⊕○○ LOW | IMPORTANT  |
| <b>Use of intervention (measured with: validated tool (Child Adult Medical Procedure Interaction Scale 0-100) by researcher; Better indicated by higher values)</b>               |                                |                          |                          |                         |                      |                      |                    |                      |                      |                                               |          |            |
| 1                                                                                                                                                                                 | randomised trials <sup>1</sup> | serious <sup>5</sup>     | no serious inconsistency | no serious indirectness | serious <sup>8</sup> | none                 | 14                 | 14                   | -                    | SMD 3.02 higher (1.89 to 4.15 higher)         | ⊕⊕○○ LOW | IMPORTANT  |
| <b>Use of intervention (yes/no)<sup>9</sup> (assessed with: observation of use of intervention by researcher (yes/no))</b>                                                        |                                |                          |                          |                         |                      |                      |                    |                      |                      |                                               |          |            |
| 1                                                                                                                                                                                 | randomised trials <sup>4</sup> | serious <sup>5</sup>     | no serious inconsistency | no serious indirectness | serious <sup>8</sup> | none                 | 7/7 (100%)         | 4/11 (36.4%)         | RR 2.5 (1.18 to 5.3) | 545 more per 1000 (from 65 more to 1000 more) | ⊕⊕○○ LOW | IMPORTANT  |
| <b>Fear (assessed with: no data were identified for this critically important outcome)</b>                                                                                        |                                |                          |                          |                         |                      |                      |                    |                      |                      |                                               |          |            |
| 0                                                                                                                                                                                 | No evidence                    |                          |                          |                         |                      | none                 | -                  | -                    | -                    | -                                             |          | CRITICAL   |

|                                                                                                                                                                    |                       |  |  |  |  |      |   |    |   |   |  |           |
|--------------------------------------------------------------------------------------------------------------------------------------------------------------------|-----------------------|--|--|--|--|------|---|----|---|---|--|-----------|
|                                                                                                                                                                    | available             |  |  |  |  |      |   |    |   |   |  |           |
| <b>Procedure Outcomes, Parent Fear, Vaccine Compliance, Memory, Preference, Satisfaction (assessed with: no data were identified for these important outcomes)</b> |                       |  |  |  |  |      |   |    |   |   |  |           |
| 0                                                                                                                                                                  | No evidence available |  |  |  |  | none | - | -  | - | - |  | IMPORTANT |
|                                                                                                                                                                    |                       |  |  |  |  |      |   | 0% |   | - |  |           |
|                                                                                                                                                                    |                       |  |  |  |  |      |   | 0% |   | - |  |           |

<sup>1</sup> In included study (Gonzalez 1993), mothers in the intervention (education) group were given oral instructions, then listened to a demonstration audiotape, then practiced with help and received prompts during the procedure

<sup>2</sup> Parent not blinded; immunizer and researcher blinded to hypothesis; unclear whether child blinded

<sup>3</sup> Confidence interval crosses the line of nonsignificance and sample size was below the recommended optimum information size (OIS) of 400 for an effect size of 0.2

<sup>4</sup> In included study (O'Laughlin 1995), mothers in the intervention (education) group were instructed to read a handout describing distraction and then chose a method with their child and to begin using it when the immunizer picked up the needle

<sup>5</sup> immunizer and parent not blinded; researcher blinded to hypothesis; unclear whether child blinded

<sup>6</sup> In included study (O'Laughlin 1995), data missing for non-significant distress as assessed by nurse and researcher using global distress ratings (range, 1-9)

<sup>7</sup> Parent not blinded; immunizer not consistently blinded; researcher blinded; unclear whether child was blinded

<sup>8</sup> Sample size was below the recommended optimum information size (OIS) of 400 for an effect size of 0.2

<sup>9</sup> Contamination of the intervention (distraction) observed
