# Supplementary material for: Psychological Interventions for Vaccine Injections in Children and Adolescents: Systematic Review of Randomized and Quasi-Randomized Controlled Trials
Source: PubMed Central journal article supplement — Clin J Pain. 2015 Sep 17;31(Suppl 10):S72–89. doi: 10.1097/AJP.0000000000000265 (PMC4900411; doi:10.1097/ajp.0000000000000265), 2015-09-17
Supplement: ajp-31-s72-s013.pdf [file ajp-31-s72-s013.pdf]

**Author(s):** MS/KH/KAB/KEB/AT

**Date:** 2015-03-26

**Question:** Should video distraction vs no treatment be used for reducing vaccine injection pain in children >3 - 12 years?<sup>1,2</sup>

**Settings:** clinics

**Bibliography:** Cassidy 2002, Cohen 1997 (1,2), Cohen 1999 (1), Cohen 2015 (1), Luthy 2013 (1)

| Quality assessment                                                                                                                                                                                                                                                      |                   |                                 |                                        |                         |                       |                      | No of patients    |              | Effect            |                                                           | Quality          | Importance |
|-------------------------------------------------------------------------------------------------------------------------------------------------------------------------------------------------------------------------------------------------------------------------|-------------------|---------------------------------|----------------------------------------|-------------------------|-----------------------|----------------------|-------------------|--------------|-------------------|-----------------------------------------------------------|------------------|------------|
| No of studies                                                                                                                                                                                                                                                           | Design            | Risk of bias                    | Inconsistency                          | Indirectness            | Imprecision           | Other considerations | Video distraction | No treatment | Relative (95% CI) | Absolute                                                  |                  |            |
| <b>Pain<sup>3,4</sup> (measured with: validated tool (Faces Pain Scale-Revised 0-100, Faces scale 1-5, 1-7, Visual Analog Scale 0-100); Better indicated by lower values)</b>                                                                                           |                   |                                 |                                        |                         |                       |                      |                   |              |                   |                                                           |                  |            |
| 4                                                                                                                                                                                                                                                                       | randomised trials | very serious <sup>5,6,7</sup>   | no serious inconsistency <sup>8</sup>  | no serious indirectness | serious <sup>9</sup>  | none                 | 158               | 121          | -                 | SMD 0.88 lower (1.78 lower to 0.02 higher) <sup>3</sup>   | ⊕○○○<br>VERY LOW | CRITICAL   |
| <b>Fear (measured with: validated tool (Visual Analog Scale 0-100); Better indicated by lower values)</b>                                                                                                                                                               |                   |                                 |                                        |                         |                       |                      |                   |              |                   |                                                           |                  |            |
| 1                                                                                                                                                                                                                                                                       | randomised trials | very serious <sup>7,10</sup>    | no serious inconsistency               | no serious indirectness | serious <sup>11</sup> | none                 | 34                | 34           | -                 | SMD 0.08 higher (0.25 lower to 0.41 higher)               | ⊕○○○<br>VERY LOW | CRITICAL   |
| <b>Distress Pre-procedure + Acute + Recovery<sup>3,12,13</sup> (measured with: validated tools (Child-Adult Medical Procedure Interaction Scale-Revised, Behaviour coding 0-1) by researcher ; Better indicated by lower values)</b>                                    |                   |                                 |                                        |                         |                       |                      |                   |              |                   |                                                           |                  |            |
| 3                                                                                                                                                                                                                                                                       | randomised trials | very serious <sup>7,10,14</sup> | no serious inconsistency <sup>8</sup>  | no serious indirectness | serious <sup>11</sup> | none                 | 127               | 93           | -                 | SMD 0.58 lower (0.82 to 0.34 lower) <sup>3,12</sup>       | ⊕○○○<br>VERY LOW | IMPORTANT  |
| <b>Distress Acute<sup>3,12,15,16,17</sup> (measured with: validated tools (Likert scale 1-5, Visual Analog Scale 0-100, Faces scale 0-5, Children's Hospital of Eastern Ontario Pain Scale 0-6) by researcher, immunizer, parent; Better indicated by lower values)</b> |                   |                                 |                                        |                         |                       |                      |                   |              |                   |                                                           |                  |            |
| 5                                                                                                                                                                                                                                                                       | randomised trials | very serious <sup>5,6,7</sup>   | no serious inconsistency <sup>18</sup> | no serious indirectness | serious <sup>11</sup> | none                 | 183               | 144          | -                 | SMD 0.96 lower (1.85 to 0.08 lower) <sup>3,12,15,16</sup> | ⊕○○○<br>VERY LOW | IMPORTANT  |
| <b>Distress Pre-procedure<sup>15,16</sup> (measured with: validated tool (Children's Hospital of Eastern Ontario Pain Scale 0-6) by researcher; Better indicated by lower values)</b>                                                                                   |                   |                                 |                                        |                         |                       |                      |                   |              |                   |                                                           |                  |            |

|                                                                                                                                                                                                                                                      |                   |                                 |                                       |                         |                       |      |     |    |   |                                                         |                  |                         |
|------------------------------------------------------------------------------------------------------------------------------------------------------------------------------------------------------------------------------------------------------|-------------------|---------------------------------|---------------------------------------|-------------------------|-----------------------|------|-----|----|---|---------------------------------------------------------|------------------|-------------------------|
| 1                                                                                                                                                                                                                                                    | randomised trials | very serious <sup>6,16,19</sup> | no serious inconsistency              | no serious indirectness | serious <sup>11</sup> | none | 29  | 29 | - | SMD 0.65 lower (1.18 to 0.12 lower) <sup>15,16</sup>    | ⊕○○○<br>VERY LOW | IMPORTANT               |
| <b>Parent Fear<sup>3</sup> (measured with: validated tool (Likert scale 1-5); Better indicated by lower values)</b>                                                                                                                                  |                   |                                 |                                       |                         |                       |      |     |    |   |                                                         |                  |                         |
| 1                                                                                                                                                                                                                                                    | randomised trials | serious <sup>20</sup>           | no serious inconsistency              | no serious indirectness | serious <sup>9</sup>  | none | 63  | 29 | - | SMD 2.18 lower (2.73 to 1.63 lower) <sup>3</sup>        | ⊕⊕○○<br>LOW      | IMPORTANT               |
| <b>Immunizer Fear (measured with: validated tool (Likert scale 1-5); Better indicated by lower values)</b>                                                                                                                                           |                   |                                 |                                       |                         |                       |      |     |    |   |                                                         |                  |                         |
| 2                                                                                                                                                                                                                                                    | randomised trials | very serious <sup>7,10,14</sup> | no serious inconsistency              | no serious indirectness | serious <sup>9</sup>  | none | 97  | 63 | - | SMD 0.00 higher (0.36 lower to 0.35 higher)             | ⊕○○○<br>VERY LOW | IMPORTANT <sup>21</sup> |
| <b>Child Use of Intervention Pre-procedure + Acute + Recovery<sup>3,12,13</sup> (measured with: validated tool Child-Adult Medical Procedure Interaction Scale-Revised, Behaviour coding 0-1) by researcher ; Better indicated by higher values)</b> |                   |                                 |                                       |                         |                       |      |     |    |   |                                                         |                  |                         |
| 3                                                                                                                                                                                                                                                    | randomised trials | very serious <sup>7,10,14</sup> | no serious inconsistency <sup>8</sup> | no serious indirectness | serious <sup>9</sup>  | none | 127 | 93 | - | SMD 2.6 higher (1.46 to 3.74 higher) <sup>3,12,13</sup> | ⊕○○○<br>VERY LOW | IMPORTANT               |
| <b>Child Use of Intervention Pre-procedure<sup>12,22</sup> (measured with: validated tool (video analysis of proportion of time watching television) by researcher; Better indicated by higher values)</b>                                           |                   |                                 |                                       |                         |                       |      |     |    |   |                                                         |                  |                         |
| 1                                                                                                                                                                                                                                                    | randomised trials | very serious <sup>6,19</sup>    | no serious inconsistency              | no serious indirectness | serious <sup>9</sup>  | none | 28  | 27 | - | SMD 1.06 higher (0.5 to 1.63 higher) <sup>12,22</sup>   | ⊕○○○<br>VERY LOW | IMPORTANT               |
| <b>Child Use of Intervention Acute<sup>22</sup> (measured with: validated tool (video analysis of proportion of time watching television) by researcher; Better indicated by higher values)</b>                                                      |                   |                                 |                                       |                         |                       |      |     |    |   |                                                         |                  |                         |
| 1                                                                                                                                                                                                                                                    | randomised trials | very serious <sup>6,19</sup>    | no serious inconsistency              | no serious indirectness | serious <sup>9</sup>  | none | 28  | 27 | - | SMD 0.57 higher (0.03 to 1.11 higher) <sup>22</sup>     | ⊕○○○<br>VERY LOW | IMPORTANT               |
| <b>Clinician Use of Intervention Pre-procedure + Acute + Recovery<sup>3,12,13</sup> (measured with: validated tool Child-Adult Medical Procedure Interaction Scale-Revised) by researcher ; Better indicated by higher values)</b>                   |                   |                                 |                                       |                         |                       |      |     |    |   |                                                         |                  |                         |

|                                                                                                                                                                                                                                                      |                       |                                 |                          |                         |                       |      |               |               |                                      |                                                        |                  |           |
|------------------------------------------------------------------------------------------------------------------------------------------------------------------------------------------------------------------------------------------------------|-----------------------|---------------------------------|--------------------------|-------------------------|-----------------------|------|---------------|---------------|--------------------------------------|--------------------------------------------------------|------------------|-----------|
| 2                                                                                                                                                                                                                                                    | randomised trials     | very serious <sup>7,10,14</sup> | no serious inconsistency | no serious indirectness | serious <sup>9</sup>  | none | 97            | 63            | -                                    | SMD 0.80 higher (0.5 to 1.1 higher) <sup>3,12,13</sup> | ⊕○○○<br>VERY LOW | IMPORTANT |
| <b>Parent Use of Intervention Pre-procedure + Acute + Recovery<sup>3,13</sup> (measured with: validated tool (Child-Adult Medical Procedure Interaction Scale-Revised, Behaviour coding 0-1)) by researcher ; Better indicated by higher values)</b> |                       |                                 |                          |                         |                       |      |               |               |                                      |                                                        |                  |           |
| 2                                                                                                                                                                                                                                                    | randomised trials     | serious <sup>20</sup>           | no serious inconsistency | no serious indirectness | serious <sup>9</sup>  | none | 93            | 59            | -                                    | SMD 0.90 higher (0.55 to 1.24 higher) <sup>3,13</sup>  | ⊕⊕○○<br>LOW      | IMPORTANT |
| <b>Parent Preferences<sup>23</sup> (assessed with: validated tool (questionnaire regarding preference for treatment))</b>                                                                                                                            |                       |                                 |                          |                         |                       |      |               |               |                                      |                                                        |                  |           |
| 1                                                                                                                                                                                                                                                    | randomised trials     | serious <sup>20</sup>           | no serious inconsistency | no serious indirectness | serious <sup>11</sup> | none | 20/26 (76.9%) | 15/21 (71.4%) | RR 1.08 (0.76 to 1.52) <sup>23</sup> | 57 more per 1000 (from 171 fewer to 371 more)          | ⊕⊕○○<br>LOW      | IMPORTANT |
|                                                                                                                                                                                                                                                      |                       |                                 |                          |                         |                       |      |               | 0%            |                                      | -                                                      |                  |           |
| <b>Child Preferences<sup>24</sup> (measured with: questionnaire by researcher; Better indicated by lower values)</b>                                                                                                                                 |                       |                                 |                          |                         |                       |      |               |               |                                      |                                                        |                  |           |
| 1                                                                                                                                                                                                                                                    | randomised trials     | very serious <sup>7,10</sup>    | no serious inconsistency | no serious indirectness | <sup>25</sup>         | none | 0             | -             | <sup>-24</sup>                       | not pooled <sup>24</sup>                               |                  | IMPORTANT |
| <b>Procedure Outcomes, Vaccine Compliance, Memory, Satisfaction (assessed with: no data were identified for these important outcomes)</b>                                                                                                            |                       |                                 |                          |                         |                       |      |               |               |                                      |                                                        |                  |           |
| 0                                                                                                                                                                                                                                                    | No evidence available |                                 |                          |                         |                       | none | -             | -             | -                                    | -                                                      |                  | IMPORTANT |
|                                                                                                                                                                                                                                                      |                       |                                 |                          |                         |                       |      |               | 0%            |                                      | -                                                      |                  |           |

<sup>1</sup> In study by Cohen 1997, analysis (1) included parent and immunizer training and analysis (2) included immunizer training only

<sup>2</sup> In study by Cohen (1999), a cross-over design was used whereby children received 3 treatments (video distraction, topical anesthesia, or no treatment). Cohen 1999 (1) compares video distraction to no treatment.

<sup>3</sup> In study by Cohen (1997), sample size for control group divided by 2

<sup>4</sup> If only the data from the study by Cohen (1997) are included, whereby children self-selected the video, then the results are altered: SMD -2.24 (95% CI -2.79 to -1.68).

<sup>5</sup> Immunizer and child not consistently blinded; outcome assessors not consistently blinded

<sup>6</sup> In study by Cassidy (2002), there is the possibility of a treatment effect for children in the control group as they were instructed to look at a television also (which was not turned on)

<sup>7</sup> In study by Cohen (1999), children were together in groups of 3-5 which may have influenced results

<sup>8</sup> Heterogeneity can be explained by differences in age (4-11 years) and differences in intervention, intervention delivery, and immunization (e.g., number of injections)

<sup>9</sup> Sample size was below the recommended optimum information size (OIS) of 400 for an effect size of 0.2

<sup>10</sup> Immunizer and child aware of group assignment

<sup>11</sup> Confidence interval crosses the line of nonsignificance and sample size was below the recommended optimum information size (OIS) of 400 for an effect size of 0.2

<sup>12</sup> In study by Cohen 1999, scores were not standardized

<sup>13</sup> In study by Cohen 1997, scores were not standardized

<sup>14</sup> Outcome assessor not consistently blinded

<sup>15</sup> In study by Cassidy (2002), sample size assumed to be 29 per group

<sup>16</sup> In study by Cassidy (2002), only scores from Children's Hospital of Eastern Ontario Pain Scale included due to attrition bias

<sup>17</sup> Study by Luthy (2013) included some children < 3 years, which would not be expected to be able to provide self-report

<sup>18</sup> Heterogeneity can be explained by differences in age (2-11 years) and differences in intervention and intervention delivery

<sup>19</sup> Researcher present at procedure not blinded; unclear blinding of others

<sup>20</sup> No one is blinded during the conduct of the trial

<sup>21</sup> accepted as important outcome as may be regarded as a measure of satisfaction

<sup>22</sup> In study by Cassidy (2002), sample size assumed to be 28 for the intervention (distraction) group and 27 for the control (no treatment) group

<sup>23</sup> Sample size for the intervention (distraction) group assumed to be 26 and sample size for the control (no treatment) group assumed to be 21

<sup>24</sup> In the study by Cohen (1999), children were asked about which treatment they preferred: 52% preferred distraction (1), 39% preferred topical anesthesia (another treatment condition in the trial, (2)) and 9% preferred no treatment

<sup>25</sup> Data not pooled
