# Supplementary material for: Psychological Interventions for Vaccine Injections in Children and Adolescents: Systematic Review of Randomized and Quasi-Randomized Controlled Trials
Source: PubMed Central journal article supplement — Clin J Pain. 2015 Sep 17;31(Suppl 10):S72–89. doi: 10.1097/AJP.0000000000000265 (PMC4900411; doi:10.1097/ajp.0000000000000265), 2015-09-17
Supplement: ajp-31-s72-s014.pdf [file ajp-31-s72-s014.pdf]

Author(s): KH/MS/KAB/KEB/CMM/AT

Date: 2015-03-21

Question: Should music distraction vs control/no treatment be used for reducing vaccine injection pain in children >3 - 12 years?<sup>1,2,3</sup>

Settings: clinic

Bibliography: Fowler-Kerry 1987 (2,4), Megel 1998, Noguchi 2006 (1,2), Yinger 2012

| Quality assessment                                                                                                                                                                                                                         |                   |                      |                          |                         |                       |                      | No of patients             |                      | Effect            |                                                             | Quality     | Importance |
|--------------------------------------------------------------------------------------------------------------------------------------------------------------------------------------------------------------------------------------------|-------------------|----------------------|--------------------------|-------------------------|-----------------------|----------------------|----------------------------|----------------------|-------------------|-------------------------------------------------------------|-------------|------------|
| No of studies                                                                                                                                                                                                                              | Design            | Risk of bias         | Inconsistency            | Indirectness            | Imprecision           | Other considerations | Music/auditory distraction | Control/no treatment | Relative (95% CI) | Absolute                                                    |             |            |
| <b>Pain<sup>4</sup> (measured with: validated tools (Visual Analog Scale 0-3, Faces Scale 0-6, Oucher Pain Scale 0-5); Better indicated by lower values)</b>                                                                               |                   |                      |                          |                         |                       |                      |                            |                      |                   |                                                             |             |            |
| 3                                                                                                                                                                                                                                          | randomised trials | serious <sup>5</sup> | no serious inconsistency | no serious indirectness | serious <sup>6</sup>  | none                 | 172                        | 189                  | -                 | SMD 0.45 lower (0.71 to 0.18 lower) <sup>4</sup>            | ⊕⊕○○<br>LOW | CRITICAL   |
| <b>Distress Pre-procedure<sup>4,7,8</sup> (measured with: validated tools (Child-Adult Medical Procedure Interaction Scale-Revised 0-1, Observational Scale of Behavioural Distress) by researcher ; Better indicated by lower values)</b> |                   |                      |                          |                         |                       |                      |                            |                      |                   |                                                             |             |            |
| 2                                                                                                                                                                                                                                          | randomised trials | serious <sup>5</sup> | no serious inconsistency | no serious indirectness | serious <sup>6</sup>  | none                 | 71                         | 47                   | -                 | SMD 0.48 lower (0.86 to 0.1 lower) <sup>4,7,8</sup>         | ⊕⊕○○<br>LOW | IMPORTANT  |
| <b>Distress Acute<sup>4,7,9</sup> (measured with: validated tools (Child-Adult Medical Procedure Interaction Scale-Revised 0-1, Faces Scale 0-6) by researcher ; Better indicated by lower values)</b>                                     |                   |                      |                          |                         |                       |                      |                            |                      |                   |                                                             |             |            |
| 2                                                                                                                                                                                                                                          | randomised trials | serious <sup>5</sup> | no serious inconsistency | no serious indirectness | serious <sup>6</sup>  | none                 | 71                         | 47                   | -                 | SMD 0.49 lower (0.87 to 0.11 lower) <sup>4,7,9</sup>        | ⊕⊕○○<br>LOW | IMPORTANT  |
| <b>Distress Recovery<sup>4,7,8</sup> (measured with: validated tools (Child-Adult Medical Procedure Interaction Scale-Revised 0-1, Observational Scale of Behavioural Distress) by researcher ; Better indicated by lower values)</b>      |                   |                      |                          |                         |                       |                      |                            |                      |                   |                                                             |             |            |
| 2                                                                                                                                                                                                                                          | randomised trials | serious <sup>5</sup> | no serious inconsistency | no serious indirectness | serious <sup>10</sup> | none                 | 71                         | 47                   | -                 | SMD 0.09 lower (0.46 lower to 0.29 higher) <sup>4,7,8</sup> | ⊕⊕○○<br>LOW | IMPORTANT  |
| <b>Distress Acute + Recovery<sup>4,7,8</sup> (measured with: validated tools (Child-Adult Medical Procedure Interaction Scale-Revised, Observational Scale of Behavioural Distress) by</b>                                                 |                   |                      |                          |                         |                       |                      |                            |                      |                   |                                                             |             |            |

|                                                                                                                                                                                                           |                       |                       |                          |                         |                       |      |    |    |                |                                                            |          |           |
|-----------------------------------------------------------------------------------------------------------------------------------------------------------------------------------------------------------|-----------------------|-----------------------|--------------------------|-------------------------|-----------------------|------|----|----|----------------|------------------------------------------------------------|----------|-----------|
| <b>researcher ; Better indicated by lower values)</b>                                                                                                                                                     |                       |                       |                          |                         |                       |      |    |    |                |                                                            |          |           |
| 2                                                                                                                                                                                                         | randomised trials     | serious <sup>5</sup>  | no serious inconsistency | no serious indirectness | serious <sup>10</sup> | none | 71 | 47 | -              | SMD 0.27 lower (0.65 lower to 0.1 higher) <sup>4,7,8</sup> | ⊕⊕○○ LOW | IMPORTANT |
| <b>Procedure Duration (measured with: validated tool (measurement of procedure duration in seconds) by researcher; Better indicated by lower values)</b>                                                  |                       |                       |                          |                         |                       |      |    |    |                |                                                            |          |           |
| 1                                                                                                                                                                                                         | randomised trials     | serious <sup>11</sup> | no serious inconsistency | no serious indirectness | serious <sup>10</sup> | none | 29 | 27 | -              | SMD 0.20 higher (0.33 lower to 0.72 higher)                | ⊕⊕○○ LOW | IMPORTANT |
| <b>Child Use of Intervention Pre-procedure<sup>7</sup> (measured with: validated tool (Child-Adult Medical Procedure Interaction Scale-Revised) by researcher ; Better indicated by higher values)</b>    |                       |                       |                          |                         |                       |      |    |    |                |                                                            |          |           |
| 1                                                                                                                                                                                                         | randomised trials     | serious <sup>11</sup> | no serious inconsistency | no serious indirectness | serious <sup>6</sup>  | none | 29 | 27 | -              | SMD 1.36 higher (0.78 to 1.95 higher) <sup>7</sup>         | ⊕⊕○○ LOW | IMPORTANT |
| <b>Child Use of intervention Acute + Recovery<sup>7</sup> (measured with: validated tool (Child-Adult Medical Procedure Interaction Scale-Revised) by researcher ; Better indicated by higher values)</b> |                       |                       |                          |                         |                       |      |    |    |                |                                                            |          |           |
| 1                                                                                                                                                                                                         | randomised trials     | serious <sup>11</sup> | no serious inconsistency | no serious indirectness | serious <sup>6</sup>  | none | 29 | 27 | -              | SMD 0.90 higher (0.34 to 1.45 higher) <sup>7</sup>         | ⊕⊕○○ LOW | IMPORTANT |
| <b>Parent Preferences<sup>12</sup> (measured with: questionnaire; Better indicated by lower values)</b>                                                                                                   |                       |                       |                          |                         |                       |      |    |    |                |                                                            |          |           |
| 1                                                                                                                                                                                                         | randomised trials     | serious <sup>11</sup> | no serious inconsistency | no serious indirectness | <sup>13</sup>         | none | 29 | -  | <sup>-12</sup> | not pooled <sup>12</sup>                                   |          | IMPORTANT |
| <b>Fear (assessed with: no data were identified for this critically important outcome)</b>                                                                                                                |                       |                       |                          |                         |                       |      |    |    |                |                                                            |          |           |
| 0                                                                                                                                                                                                         | No evidence available |                       |                          |                         |                       | none | -  | -  | -              | -                                                          |          | CRITICAL  |
| <b>Parent Fear, Vaccine Compliance, Memory, Preference, Satisfaction (assessed with: no data were identified for these important outcomes)</b>                                                            |                       |                       |                          |                         |                       |      |    |    |                |                                                            |          |           |
| 0                                                                                                                                                                                                         | No evidence available |                       |                          |                         |                       | none | -  | -  | -              | -                                                          |          | IMPORTANT |
|                                                                                                                                                                                                           |                       |                       |                          |                         |                       |      |    | 0% |                | -                                                          |          |           |

<sup>1</sup> In study by Noguchi (2006), analysis (1) compared musical storytelling with no treatment and analysis (2) compared auditory storytelling with no treatment. Children in the treatment groups were instructed and practiced prior to the procedure

<sup>2</sup> In study by Fowler Kerry, analysis (2) compared music distraction with no treatment and analysis (4) compared music distraction and suggestion with suggestion

<sup>3</sup> In study by Yinger (2012), children were instructed in music therapy by a music therapist and practiced prior to the procedure

<sup>4</sup> In study by Noguchi (2006), the sample size in the control group was divided by 2

<sup>5</sup> Inconsistent blinding of participants, immunizers; inconsistent blinding of outcome assessors

<sup>6</sup> Sample size was below the recommended optimum information size (OIS) of 400 for an effect size of 0.2

<sup>7</sup> In study by Yinger (2012), proportion scores used; range assumed to be 0-1)

<sup>8</sup> In study by Noguchi (2006), scores were not standardised

<sup>9</sup> In study by Noguchi (2006), only Faces pain scores included in this analysis

<sup>10</sup> Confidence interval crosses the line of nonsignificance and sample size was below the recommended optimum information size (OIS) of 400 for an effect size of 0.2

<sup>11</sup> There is no blinding

<sup>12</sup> In study by Yinger (2012), 23 out of 29 (79%) parents in the intervention (music) group indicated they would use the intervention again in the future

<sup>13</sup> Data not pooled
