# Supplementary material for: Psychological Interventions for Vaccine Injections in Children and Adolescents: Systematic Review of Randomized and Quasi-Randomized Controlled Trials
Source: PubMed Central journal article supplement — Clin J Pain. 2015 Sep 17;31(Suppl 10):S72–89. doi: 10.1097/AJP.0000000000000265 (PMC4900411; doi:10.1097/ajp.0000000000000265), 2015-09-17
Supplement: ajp-31-s72-s015.pdf [file ajp-31-s72-s015.pdf]

**Author(s):** KH/MS/KAB/KEB/CMM/AT

**Date:** 2015-03-21

**Question:** Should music distraction vs no treatment be used for reducing vaccine injection pain in adolescents >12 -17 years?<sup>1</sup>

**Settings:** school

**Bibliography:** Kristjansdottir 2011 (1,2)

| Quality assessment                                                                                                                                                                                |                       |                      |                          |                         |                      |                      | No of patients             |              | Effect            |                                                         | Quality  | Importance |
|---------------------------------------------------------------------------------------------------------------------------------------------------------------------------------------------------|-----------------------|----------------------|--------------------------|-------------------------|----------------------|----------------------|----------------------------|--------------|-------------------|---------------------------------------------------------|----------|------------|
| No of studies                                                                                                                                                                                     | Design                | Risk of bias         | Inconsistency            | Indirectness            | Imprecision          | Other considerations | Music/auditory distraction | No treatment | Relative (95% CI) | Absolute                                                |          |            |
| <b>Pain<sup>2</sup> (measured with: validated tools (Visual Analog Scale 0-3, 0-10); Better indicated by lower values)</b>                                                                        |                       |                      |                          |                         |                      |                      |                            |              |                   |                                                         |          |            |
| 1                                                                                                                                                                                                 | randomised trials     | serious <sup>3</sup> | no serious inconsistency | no serious indirectness | serious <sup>4</sup> | none                 | 79                         | 39           | -                 | SMD 0.04 lower (0.42 lower to 0.34 higher) <sup>2</sup> | ⊕⊕○○ LOW | CRITICAL   |
| <b>Fear (assessed with: no data were identified for this critically important outcome)</b>                                                                                                        |                       |                      |                          |                         |                      |                      |                            |              |                   |                                                         |          |            |
| 0                                                                                                                                                                                                 | No evidence available |                      |                          |                         |                      | none                 | -                          | -            | -                 | -                                                       |          | CRITICAL   |
| <b>Distress, Procedure Outcomes, Use of Intervention, Parent Fear, Vaccine Compliance, Memory, Preference, Satisfaction (assessed with: no data were identified for these important outcomes)</b> |                       |                      |                          |                         |                      |                      |                            |              |                   |                                                         |          |            |
| 0                                                                                                                                                                                                 | No evidence available |                      |                          |                         |                      | none                 | -                          | -            | -                 | -                                                       |          | IMPORTANT  |
|                                                                                                                                                                                                   |                       |                      |                          |                         |                      |                      |                            | 0%           |                   | -                                                       |          |            |

<sup>1</sup> In study by Kristjansdottir (2011), analysis (1) compared music with headphones with no treatment and analysis (2) compared music without headphones with no treatment

<sup>2</sup> In study by Kristjansdottir (2011), the sample size in the control group was divided by 2

<sup>3</sup> Participants not blinded; immunizers blinded to hypothesis

<sup>4</sup> Confidence interval crosses the line of nonsignificance and sample size was below the recommended optimum information size (OIS) of 400 for an effect size of 0.2
