# Supplementary material for: Psychological Interventions for Vaccine Injections in Children and Adolescents: Systematic Review of Randomized and Quasi-Randomized Controlled Trials
Source: PubMed Central journal article supplement — Clin J Pain. 2015 Sep 17;31(Suppl 10):S72–89. doi: 10.1097/AJP.0000000000000265 (PMC4900411; doi:10.1097/ajp.0000000000000265), 2015-09-17
Supplement: ajp-31-s72-s016.pdf [file ajp-31-s72-s016.pdf]

**Author(s):** KAB/KEB/KH/AT/JAP

**Date:** 2015-03-21

**Question:** Should breathing with a toy distraction during vaccine injections vs control/no treatment be used for reducing vaccine injection pain in children >3 - 12 years?<sup>1</sup>

**Settings:** health department clinic

**Bibliography:** Beran 2013, Blount 1992, Bowen 1999 (1,2), Krauss 1997, Manimala 2000 (1), Sparks 2001 (2) (1998 thesis)

| Quality assessment                                                                                                                                                                              |                   |                           |                          |                         |                      |                      | No of patients                                             |                      | Effect            |                                                           | Quality       | Importance |
|-------------------------------------------------------------------------------------------------------------------------------------------------------------------------------------------------|-------------------|---------------------------|--------------------------|-------------------------|----------------------|----------------------|------------------------------------------------------------|----------------------|-------------------|-----------------------------------------------------------|---------------|------------|
| No of studies                                                                                                                                                                                   | Design            | Risk of bias              | Inconsistency            | Indirectness            | Imprecision          | Other considerations | Breathing with a toy distraction during vaccine injections | Control/no treatment | Relative (95% CI) | Absolute                                                  |               |            |
| <b>Fear Pre-procedure (measured with: validated tool (Faces scale 1-5); Better indicated by lower values)</b>                                                                                   |                   |                           |                          |                         |                      |                      |                                                            |                      |                   |                                                           |               |            |
| 1                                                                                                                                                                                               | randomised trials | very serious <sup>2</sup> | no serious inconsistency | no serious indirectness | serious <sup>3</sup> | none                 | 28                                                         | 27                   | -                 | SMD 0.53 lower (1.07 lower to 0.01 higher)                | ⊕000 VERY LOW | CRITICAL   |
| <b>Pain (measured with: validated tools (Faces Pain Scale-Revised 0-10, Oucher Pain Scale 0-5); Better indicated by lower values)</b>                                                           |                   |                           |                          |                         |                      |                      |                                                            |                      |                   |                                                           |               |            |
| 2                                                                                                                                                                                               | randomised trials | very serious <sup>4</sup> | no serious inconsistency | no serious indirectness | serious <sup>5</sup> | none                 | 61                                                         | 62                   | -                 | SMD 0.49 lower (0.85 to 0.13 lower)                       | ⊕000 VERY LOW | CRITICAL   |
| <b>Fear<sup>6,7</sup> (measured with: validated tool (Faces scale 1-6); Better indicated by lower values)</b>                                                                                   |                   |                           |                          |                         |                      |                      |                                                            |                      |                   |                                                           |               |            |
| 1                                                                                                                                                                                               | randomised trials | very serious <sup>8</sup> | no serious inconsistency | no serious indirectness | serious <sup>3</sup> | none                 | 59                                                         | 21                   | -                 | SMD 0.60 lower (1.22 lower to 0.02 higher) <sup>6,7</sup> | ⊕000 VERY LOW | CRITICAL   |
| <b>Distress Acute<sup>6,7</sup> (measured with: validated tools (Faces Pain Scale-Revised 0-10, Faces pain scale 1-6) by researchers, parents, immunizer; Better indicated by lower values)</b> |                   |                           |                          |                         |                      |                      |                                                            |                      |                   |                                                           |               |            |
| 2                                                                                                                                                                                               | randomised trials | very serious <sup>4</sup> | no serious inconsistency | no serious indirectness | serious <sup>5</sup> | none                 | 87                                                         | 50                   | -                 | SMD 0.80 lower (1.17 to 0.42 lower) <sup>6,7</sup>        | ⊕000 VERY LOW | IMPORTANT  |

|                                                                                                                                                                                                                                                                                                                                          |                   |                              |                          |                         |                      |      |     |     |                 |                                                     |               |           |
|------------------------------------------------------------------------------------------------------------------------------------------------------------------------------------------------------------------------------------------------------------------------------------------------------------------------------------------|-------------------|------------------------------|--------------------------|-------------------------|----------------------|------|-----|-----|-----------------|-----------------------------------------------------|---------------|-----------|
| <b>Distress Pre-procedure + Acute + Recovery<sup>9</sup> (measured with: validated tools (Child-Adult Medical Procedure Interaction Scale distress and restraint sub-scales, Behavioral Approach-Avoidance and Distress Scale distress subscale 0-20, Child Medical Distress Scale) by researcher; Better indicated by lower values)</b> |                   |                              |                          |                         |                      |      |     |     |                 |                                                     |               |           |
| 4                                                                                                                                                                                                                                                                                                                                        | randomised trials | very serious <sup>4,10</sup> | no serious inconsistency | no serious indirectness | serious <sup>5</sup> | none | 111 | 111 | -               | SMD 0.55 lower (0.82 to 0.28 lower)                 | ⊕000 VERY LOW | IMPORTANT |
| <b>Parent Fear Pre-procedure (measured with: validated tool (Visual Analog Scale 0-10); Better indicated by lower values)</b>                                                                                                                                                                                                            |                   |                              |                          |                         |                      |      |     |     |                 |                                                     |               |           |
| 1                                                                                                                                                                                                                                                                                                                                        | randomised trials | very serious <sup>2</sup>    | no serious inconsistency | no serious indirectness | serious <sup>3</sup> | none | 28  | 27  | -               | SMD 0.32 lower (0.85 lower to 0.22 higher)          | ⊕000 VERY LOW | IMPORTANT |
| <b>Parent Fear (measured with: validated tool (Likert scale 1-5); Better indicated by lower values)</b>                                                                                                                                                                                                                                  |                   |                              |                          |                         |                      |      |     |     |                 |                                                     |               |           |
| 1                                                                                                                                                                                                                                                                                                                                        | randomised trials | very serious <sup>2</sup>    | no serious inconsistency | no serious indirectness | serious <sup>5</sup> | none | 28  | 27  | -               | SMD 0.06 lower (0.59 lower to 0.47 higher)          | ⊕000 VERY LOW | IMPORTANT |
| <b>Child Use of Intervention<sup>11,12</sup> (measured with: validated tool (Child-Adult Medical Procedure Interaction Scale) by researcher; Better indicated by higher values)</b>                                                                                                                                                      |                   |                              |                          |                         |                      |      |     |     |                 |                                                     |               |           |
| 2                                                                                                                                                                                                                                                                                                                                        | randomised trials | very serious <sup>4</sup>    | no serious inconsistency | no serious indirectness | serious <sup>3</sup> | none | 58  | 57  | -               | SMD 2.05 higher (1.58 to 2.52 higher) <sup>11</sup> | ⊕000 VERY LOW | IMPORTANT |
| <b>Parent Use of Intervention (measured with: validated tool (Child-Adult Medical Procedure Interaction Scale) by researcher; Better indicated by higher values)</b>                                                                                                                                                                     |                   |                              |                          |                         |                      |      |     |     |                 |                                                     |               |           |
| 1                                                                                                                                                                                                                                                                                                                                        | randomised trials | very serious <sup>2</sup>    | no serious inconsistency | no serious indirectness | serious <sup>5</sup> | none | 28  | 27  | -               | SMD 1.10 higher (0.53 to 1.67 higher)               | ⊕000 VERY LOW | IMPORTANT |
| <b>Child Preferences<sup>13</sup> (measured with: questions to child ; Better indicated by higher values)</b>                                                                                                                                                                                                                            |                   |                              |                          |                         |                      |      |     |     |                 |                                                     |               |           |
| 1                                                                                                                                                                                                                                                                                                                                        | randomised trials | serious <sup>14</sup>        | no serious inconsistency | no serious indirectness |                      | none | 28  | -   | - <sup>13</sup> | not pooled <sup>13</sup>                            |               | IMPORTANT |
| <b>Parent Preferences<sup>15</sup> (measured with: question to parents; Better indicated by higher values)</b>                                                                                                                                                                                                                           |                   |                              |                          |                         |                      |      |     |     |                 |                                                     |               |           |

|                                                                                                                                           |                       |                       |                          |                         |  |      |    |    |                 |                          |  |           |
|-------------------------------------------------------------------------------------------------------------------------------------------|-----------------------|-----------------------|--------------------------|-------------------------|--|------|----|----|-----------------|--------------------------|--|-----------|
| 1                                                                                                                                         | randomised trials     | serious <sup>14</sup> | no serious inconsistency | no serious indirectness |  | none | 28 | -  | - <sup>15</sup> | not pooled <sup>15</sup> |  | IMPORTANT |
| <b>Procedure Outcomes, Vaccine Compliance, Memory, Satisfaction (assessed with: no data were identified for these important outcomes)</b> |                       |                       |                          |                         |  |      |    |    |                 |                          |  |           |
| 0                                                                                                                                         | No evidence available |                       |                          |                         |  | none | -  | -  | -               | -                        |  | IMPORTANT |
|                                                                                                                                           |                       |                       |                          |                         |  |      |    | 0% |                 | -                        |  |           |

<sup>1</sup> In 3 included studies (Blount 1992, Krauss 1997, Manimala 2000), there was verbal or video instruction directed to parents and children prior to the procedure

<sup>2</sup> Not truly random; parent and researcher not blinded; immunizer blinded to hypothesis; unclear if child blinded; contamination of intervention (distraction) in control (no treatment) group

<sup>3</sup> Confidence interval crosses line of nonsignificance and sample size was below the recommended optimum information size (OIS) of 400 for an effect size of 0.2

<sup>4</sup> Not consistently randomized; not blinded

<sup>5</sup> Sample size was below the recommended optimum information size (OIS) of 400 for an effect size of 0.2

<sup>6</sup> In study by Bowen (1999), analysis (1) included children included blowing with a party blower (intervention) versus no treatment; analysis (2) included children blowing with a pinwheel (intervention) versus no treatment.

<sup>7</sup> The control (no treatment) group for the included study (Bowen 1999) is divided by 2

<sup>8</sup> Not truly randomized; not blinded

<sup>9</sup> Scores from Krauss (1997) not standardized

<sup>10</sup> In 1 included study (Blount 1992), not all measures that assessed this construct could be combined for inclusion in the meta-analysis due to selective outcome reporting

<sup>11</sup> Scores from Blount (1992) not standardized

<sup>12</sup> Scores from Manimala (2000) not standardized

<sup>13</sup> In study by Beran (2013), 25/28 (89%) of children in the intervention (breathing with robot) group reported they would like the intervention again in the future

<sup>14</sup> Immunizer, parent, child not blinded

<sup>15</sup> In study by Beran (2013), 25/28 (89%) of parents in the intervention (breathing with robot) group reported they would like the intervention again in the future
