# Supplementary material for: Psychological Interventions for Vaccine Injections in Children and Adolescents: Systematic Review of Randomized and Quasi-Randomized Controlled Trials
Source: PubMed Central journal article supplement — Clin J Pain. 2015 Sep 17;31(Suppl 10):S72–89. doi: 10.1097/AJP.0000000000000265 (PMC4900411; doi:10.1097/ajp.0000000000000265), 2015-09-17
Supplement: ajp-31-s72-s017.pdf [file ajp-31-s72-s017.pdf]

Author(s): MS/KEB/KAB/AT

Date: 2015-03-21

Question: Should breathing without a toy distraction during vaccine injections vs control/no treatment be used for reducing vaccine injection pain in children >3 - 12 years?<sup>1,2</sup>

Settings: clinics

Bibliography: Cohen 2002 a, French 1994

| Quality assessment                                                                                                                                                                                                               |                       |                           |                          |                         |                      |                      | No of patients                                                |                      | Effect            |                                                            | Quality          | Importance |
|----------------------------------------------------------------------------------------------------------------------------------------------------------------------------------------------------------------------------------|-----------------------|---------------------------|--------------------------|-------------------------|----------------------|----------------------|---------------------------------------------------------------|----------------------|-------------------|------------------------------------------------------------|------------------|------------|
| No of studies                                                                                                                                                                                                                    | Design                | Risk of bias              | Inconsistency            | Indirectness            | Imprecision          | Other considerations | Breathing without a toy distraction during vaccine injections | Control/no treatment | Relative (95% CI) | Absolute                                                   |                  |            |
| <b>Pain<sup>3,4</sup> (measured with: validated tool (Faces Scale 1-5); Better indicated by lower values)</b>                                                                                                                    |                       |                           |                          |                         |                      |                      |                                                               |                      |                   |                                                            |                  |            |
| 2                                                                                                                                                                                                                                | randomised trials     | very serious <sup>5</sup> | no serious inconsistency | no serious indirectness | serious <sup>6</sup> | none                 | 70                                                            | 66                   | -                 | MD 0.27 lower (0.61 lower to 0.07 higher) <sup>3,4</sup>   | ⊕○○○<br>VERY LOW | CRITICAL   |
| <b>Fear<sup>1,3</sup> (measured with: validated tool (Faces Scale 1-5); Better indicated by lower values)</b>                                                                                                                    |                       |                           |                          |                         |                      |                      |                                                               |                      |                   |                                                            |                  |            |
| 1                                                                                                                                                                                                                                | randomised trials     | very serious <sup>7</sup> | no serious inconsistency | no serious indirectness | serious <sup>6</sup> | none                 | 31                                                            | 30                   | -                 | MD 0.36 lower (0.86 lower to 0.15 higher) <sup>1,3</sup>   | ⊕○○○<br>VERY LOW | CRITICAL   |
| <b>Distress Unclear<sup>3,4,8</sup> (measured with: validated tool (Observational Scale of Behavioural Distress, Child-Adult Medical Procedure Interacion Scale-Short Form) by researcher; Better indicated by lower values)</b> |                       |                           |                          |                         |                      |                      |                                                               |                      |                   |                                                            |                  |            |
| 2                                                                                                                                                                                                                                | randomised trials     | very serious <sup>5</sup> | no serious inconsistency | no serious indirectness | serious <sup>6</sup> | none                 | 70                                                            | 66                   | -                 | MD 0.27 lower (0.61 lower to 0.07 higher) <sup>3,4,8</sup> | ⊕○○○<br>VERY LOW | IMPORTANT  |
| <b>Procedure Outcomes, Use of Intervention, Parent Fear, Vaccine Compliance, Memory, Preference, Satisfaction (assessed with: no data were identified for these important outcomes)</b>                                          |                       |                           |                          |                         |                      |                      |                                                               |                      |                   |                                                            |                  |            |
| 0                                                                                                                                                                                                                                | No evidence available |                           |                          |                         |                      | none                 | -                                                             | -                    | -                 | -                                                          |                  | IMPORTANT  |
|                                                                                                                                                                                                                                  |                       |                           |                          |                         |                      |                      |                                                               | 0%                   |                   | -                                                          |                  |            |

<sup>1</sup> In included study by Cohen (2002 a), children in the intervention (breathing) group were instructed in deep breathing and positive self-statements using a 7 minute video and then practiced with a research assistant. The control group received a placebo video without specific advice.

<sup>2</sup> In included study by French (1994), children in the intervention (breathing) group were verbally instructed in deep breathing, practiced with a research assistant and then were coached during the procedure; children in the control (no intervention) group did not receive any specific instruction and/or guidance. Children were immunized in groups of 4 at a time; alternate day allocation was employed to prevent contamination.

<sup>3</sup> Additional information and data provided by author (Cohen 2002 a)

<sup>4</sup> Additional information and data provided by author (French 1994)

<sup>5</sup> Not truly randomized; not consistently blinded; some selective outcome reporting

<sup>6</sup> Confidence interval crosses the line of nonsignificance and sample size was below the recommended optimum information size (OIS) of 400 for an effect size of 0.2

<sup>7</sup> Not truly randomized; child not blinded; immunizer and parent blinded; selective outcome reporting

<sup>8</sup> Scores were not standardized prior to meta-analysis
