# Supplementary material for: Psychological Interventions for Vaccine Injections in Children and Adolescents: Systematic Review of Randomized and Quasi-Randomized Controlled Trials
Source: PubMed Central journal article supplement — Clin J Pain. 2015 Sep 17;31(Suppl 10):S72–89. doi: 10.1097/AJP.0000000000000265 (PMC4900411; doi:10.1097/ajp.0000000000000265), 2015-09-17
Supplement: ajp-31-s72-s018.pdf [file ajp-31-s72-s018.pdf]

Author(s): CMM/KAB/AT

Date: 2015-03-31

Question: Should a breathing intervention (cough) vs no treatment be used for reducing vaccine injection pain in children >3 - 17 years?<sup>1</sup>

Settings: clinic

Bibliography: Wallace 2010

| Quality assessment                                                                                                                                                         |                       |                      |                          |                         |                      |                      | No of patients                   |              | Effect            |                                                           | Quality  | Importance |
|----------------------------------------------------------------------------------------------------------------------------------------------------------------------------|-----------------------|----------------------|--------------------------|-------------------------|----------------------|----------------------|----------------------------------|--------------|-------------------|-----------------------------------------------------------|----------|------------|
| No of studies                                                                                                                                                              | Design                | Risk of bias         | Inconsistency            | Indirectness            | Imprecision          | Other considerations | A breathing intervention (cough) | No treatment | Relative (95% CI) | Absolute                                                  |          |            |
| <b>Pain<sup>2</sup> (measured with: validated tool (Visual Analog Scale 0-100); Better indicated by lower values)</b>                                                      |                       |                      |                          |                         |                      |                      |                                  |              |                   |                                                           |          |            |
| 1                                                                                                                                                                          | randomised trials     | serious <sup>3</sup> | no serious inconsistency | no serious indirectness | serious <sup>4</sup> | none                 | 68                               | 68           | -                 | SMD 0.17 lower (0.41 lower to 0.07 higher) <sup>2</sup>   | ⊕⊕○○ LOW | CRITICAL   |
| <b>Distress Acute<sup>2,5</sup> (measured with: validated tools (Visual Analog Scale 0-100) by nurse/parent; Better indicated by lower values)</b>                         |                       |                      |                          |                         |                      |                      |                                  |              |                   |                                                           |          |            |
| 1                                                                                                                                                                          | randomised trials     | serious <sup>6</sup> | no serious inconsistency | no serious indirectness | serious <sup>4</sup> | none                 | 68                               | 68           | -                 | SMD 0.22 lower (0.46 lower to 0.02 higher) <sup>2,5</sup> | ⊕⊕○○ LOW | IMPORTANT  |
| <b>Child Satisfaction<sup>2,7</sup> (measured with: 8-item questionnaire 8-48; Better indicated by higher values)</b>                                                      |                       |                      |                          |                         |                      |                      |                                  |              |                   |                                                           |          |            |
| 1                                                                                                                                                                          | randomised trials     | serious <sup>6</sup> | no serious inconsistency | no serious indirectness | serious <sup>8</sup> | none                 | 0                                | -            | - <sup>2,7</sup>  | not pooled <sup>2,7</sup>                                 | ⊕⊕○○ LOW | IMPORTANT  |
| <b>Fear (assessed with: no data were identified for this critically important outcome)</b>                                                                                 |                       |                      |                          |                         |                      |                      |                                  |              |                   |                                                           |          |            |
| 0                                                                                                                                                                          | No evidence available |                      |                          |                         |                      | none                 | -                                | -            | -                 | -                                                         |          | CRITICAL   |
| <b>Procedure Outcomes, Use of Intervention, Vaccine Compliance, Memory, Preference, Satisfaction (assessed with: no data were identified for these important outcomes)</b> |                       |                      |                          |                         |                      |                      |                                  |              |                   |                                                           |          |            |
| 0                                                                                                                                                                          | No evidence available |                      |                          |                         |                      | none                 | -                                | -            | -                 | -                                                         |          | IMPORTANT  |
|                                                                                                                                                                            |                       |                      |                          |                         |                      |                      |                                  | 0%           |                   | -                                                         |          |            |

<sup>1</sup> In study by Wallace (2010), a cross-over design was used. Two age groups were combined: 4-5 years (n=22) and 11-13 years (n=46)

<sup>2</sup> Additional data and study details provided by author (Wallace 2010)

<sup>3</sup> Operator and participant not blinded

<sup>4</sup> Confidence interval crosses the line of nonsignificance and sample size was below the recommended optimum information size (OIS) of 400 for an effect size of 0.2

<sup>5</sup> Sample size was assumed to be 68

<sup>6</sup> Participants not blinded; immunizers blinded to hypothesis

<sup>7</sup> In included study (Wallace 2010), older children (i.e., 11-13 years) reported satisfaction with the intervention. The mean (SD) satisfaction score was 35.26 (9.28) (n=42 out of 46). Higher scores equal more satisfaction; the maximum score that could be achieved was 48.

<sup>8</sup> Sample size was below the recommended optimum information size (OIS) of 400 for an effect size of 0.2
