# Supplementary figures and images for: Psychological Interventions for Vaccine Injections in Children and Adolescents: Systematic Review of Randomized and Quasi-Randomized Controlled Trials
Source: PubMed Central journal article supplement — Clin J Pain. 2015 Sep 17;31(Suppl 10):S72–89. doi: 10.1097/AJP.0000000000000265 (PMC4900411; doi:10.1097/ajp.0000000000000265), 2015-09-17

## Revman Plots: Music distraction adolescents >12 – 17 years

### Pain

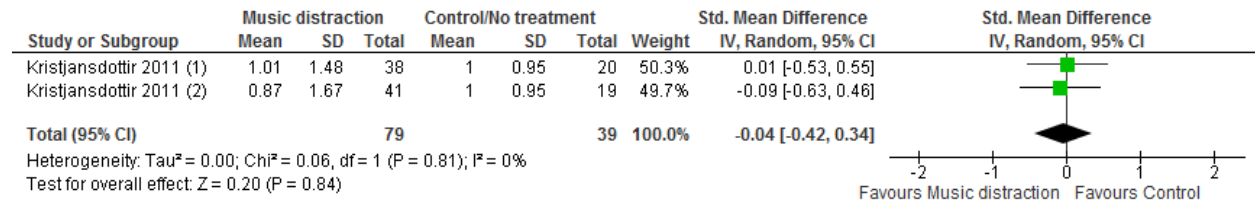

Supplement: ajp-31-s72-s006.pdf [file ajp-31-s72-s006.pdf]

## Revman Plots: Breathing without a toy distraction child >3-12 yrs

### Pain

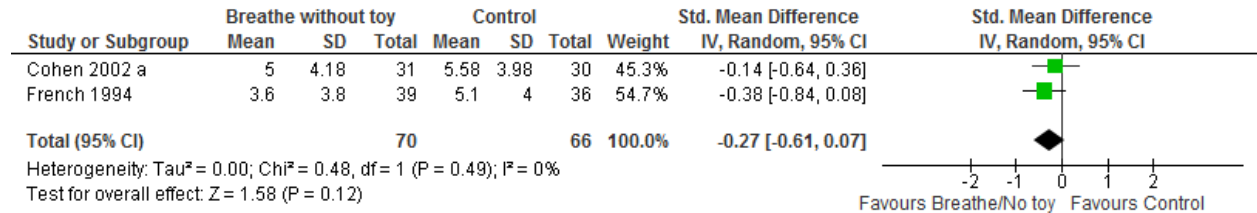

### Fear

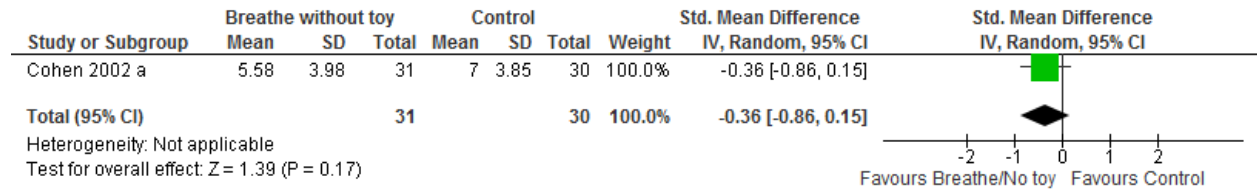

### Distress Unclear

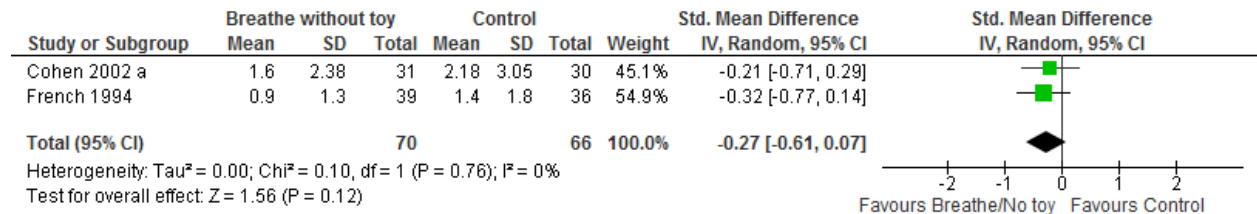

Supplement: ajp-31-s72-s008.pdf [file ajp-31-s72-s008.pdf]

## Revman Plots: Breathing intervention (cough) in children >3 – 17 years

### Pain

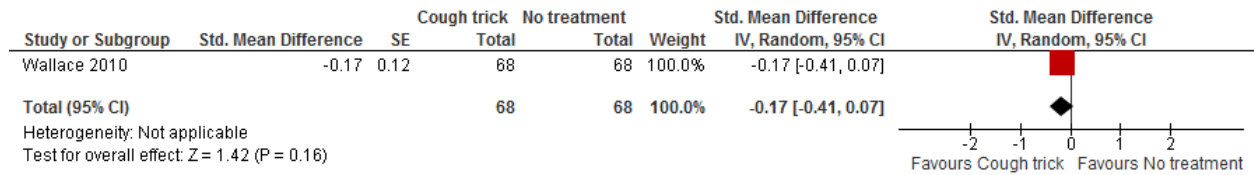

### Distress Acute

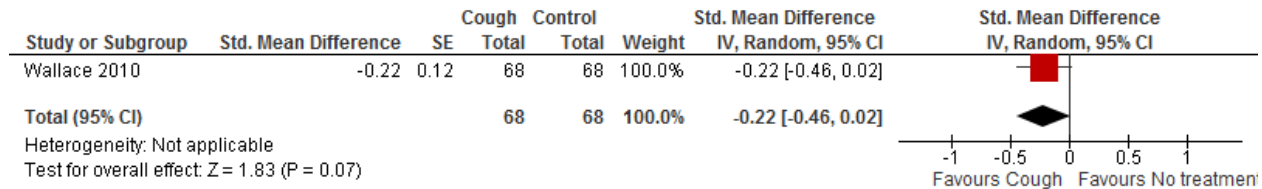

Supplement: ajp-31-s72-s009.pdf [file ajp-31-s72-s009.pdf]
